# Supplementary material for: A 5-Year Review of Invasive Fungal Infection at an Academic Medical Center
Source: Front Cell Infect Microbiol. 2020 Oct 22;10:553648. doi: 10.3389/fcimb.2020.553648 (PMC7642834; doi:10.3389/fcimb.2020.553648)
Supplement: Supplementary file 2 [file Table_2.XLSX]

## Sheet: Sheet1
	Antifungal agent	MIC (μg/ mL)	sensitive	Dose-dependent sensitivity	Not sensitive
Candida albicans	fluconazole (n=88)	<1	84 (95.5%)	0	4 (4.5%)
	voriconazole (n=88)	<0.06	85 (96.6%)	3 (3.4%)	0
	itraconazole (n=88)	<0.125	84 (95.5%)	3 (3.4%)	1 (1.1%)
	Amphotericin B (n=88)	<0.5	87 (98.9%)	0	1 (1.1%)
	Fluorine cytosine (n=88)	<4	85 (96.7%)	1 (1.1%)	2 (2.3%)
Candida parapsilosis	fluconazole (n=173)	<1	172 (99.4%)	1 (0.6%)	0
	voriconazole (n=173)	<0.06	173 (100%)	0	0
	itraconazole (n=173)	<0.125	173 (100%)	0	0
	Amphotericin B (n=174)	<0.5	173 (99.4%)	0	1 (0.6%)
	Fluorine cytosine (n=173)	<4	173 (100%)	0	0
Candida guilliermondii	fluconazole (n=136)	<1	133 (97.8%)	2 (1.5%)	1 (0.7%)
	voriconazole (n=136)	<0.06	136 (100%)	0	0
	itraconazole (n=135)	<0.125	111 (82.2%)	22 (16.3%)	2 (1.5%)
	Amphotericin B (n=136)	<0.5	136 (100%)	0	0
	Fluorine cytosine (n=136)	<4	136 (100%)	0	0
Candida glabrata	fluconazole (n=41)	<1	8 (19.5%)	33 (80.5%)	0
	voriconazole (n=40)	<0.06	32 (80.0%)	8 (20.0%)	0
	itraconazole(n=40)	<0.125	17 (42.5%)	21 (52.5%)	2 (5%)
	Amphotericin B(n=41)	<0.5	40 (97.6%)	1 (2.4%)	0
	Fluorine cytosine (n=41)	<4	41 (100%)	0	0
Candida tropicalis	fluconazole (n=37)	<1	26 (70.3%)	3 (8.1%)	8 (21.6%)
	voriconazole (n=37)	<0.06	25 (67.6%)	4 (10.8%)	8 (21.6%)
	itraconazole (n=37)	<0.125	25 (67.6%)	8(21.6%)	4 (10.8%)
	Amphotericin B (n=37)	<0.5	37 (100%)	0	0
	Fluorine cytosine (n=37)	<4	37 (10%)	0	0
Cryptococcus neoformans	fluconazole (n=5)	<1	4 (80%)	0	1 (20%)
	voriconazole (n=5)	<0.06	4 (80%)	0	1 (20%)
	itraconazole (n=5)	<0.125	4 (80%)	0	1 (20%)
	Amphotericin B (n=5)	<0.5	5 (100%)	0	0
	Fluorine cytosine (n=5)	<4	5 (100%)	0	0
Candida krusei	fluconazole (n=5)	<1	1 (20%)	0	4 (80%)
	voriconazole (n=5)	<0.125	5 (100%)	0	0
	itraconazole (n=5)	<0.125	1 (20%)	4 (80%)	0
	Amphotericin B (n=5)	<0.5	5 (100%)	0	0
	Fluorine cytosine (n=5)	<4	3 (60%)	2 (40%)	0
All fungi	fluconazole (n=485)	<1	428 (88.2%)	39 (8.0%)	18 (3.7%)
	voriconazole (n=484)	<0.125	460 (95.0%)	15 (3.1%)	9 (1.9%)
	itraconazole (n=483)	<0.125	415 (85.9%)	58 (12.0%)	10 (2.1%)
	Amphotericin B (n=486)	<0.5	483 (99.4%)	1 (0.2%)	2 (0.4%)
	Fluorine cytosine (n=485)	<4	480 (99.0%)	3 (0.6%)	2 (0.4%)
